# Supplementary material
Source: PubMed Central journal article supplement (PMC2733822)
Supplement: den087_1.pdf [file den087_1.pdf]

# Table 1

**Table 1.** Oligo primers used for real-time reverse transcriptase-polymerase chain reaction (RT-PCR) and the amplicons size.

| Target genes | Primer  | Sequence (5'→3')       | Amplicon length (bp) |
|--------------|---------|------------------------|----------------------|
| PR           | Forward | ggcatggtccttggaggt     | 90                   |
|              | Reverse | caatggctgtgggagagc     |                      |
| IGF -I       | Forward | tgtggagacaggggcttta    | 84                   |
|              | Reverse | atccacgatgcctgtctga    |                      |
| A-myb        | Forward | ctcctttaagaatgcgcttg   | 74                   |
|              | Reverse | agcaagtggctgggacac     |                      |
| ER- $\alpha$ | Forward | aaccagtgcaccattgataaaa | 111                  |
|              | Reverse | tcctcttcggtcttttcgtatc |                      |
| ER- $\beta$  | Forward | gtttgggtgattgccaaga    | 113                  |
|              | Reverse | tgttccatgcccttgttactc  |                      |
| GAPDH        | Forward | agccacatcgctcagacac    | 66                   |
|              | Reverse | gccaatacgaaccaatcc     |                      |

PR, progesterone receptor; IGF-I, insulin-like growth factor-I; ER $\alpha$ , estrogen receptor alpha; ER  $\beta$ , estrogen receptor beta; GAPDH, glyceraldehyde-3-phosphate dehydrogenase.
